# Supplementary material
Source: publisher figshare collection journal article supplement (https://sage.figshare.com/ndownloader/files/13569320)
Supplement: Supplementary file 1 [file 13569320]

**Supplemental Figure S1**

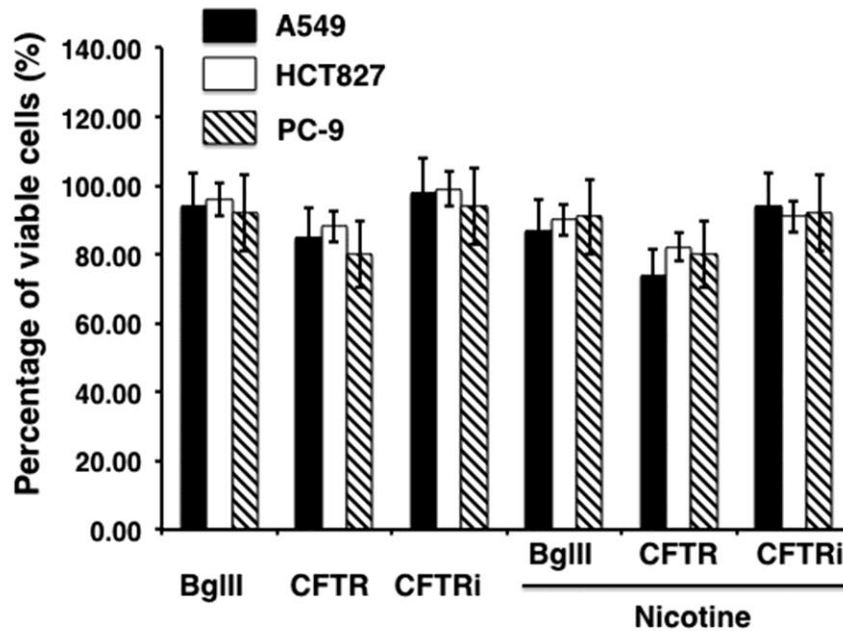

**Supplemental Figure S1. Impact of CFTR on the cell proliferation of A549 cells.**

Lung adenocarcinoma A549 cells, HCC827 and PC-9 cells were infected with Ad/BgIII (BgIII), Ad/CFTR (CFTR) and Ad/CFTRi (CFTRi) for 24h before they were exposed to nicotine or control for additional 24h. The capability of cell proliferation was ascertained by a CCK8 assay. The results showed that an overexpression of CFTR moderately inhibited cell proliferation without a statistical difference in all three tested cell types, regardless the absence and presence of nicotine. Interestingly, a knockdown of the endogenous CFTR by shRNA rescued the nicotine-arrested cell proliferation ( $p < 0.01$ ). Compared with Ad/BgIII-infected cells cultured in the absence of nicotine;  $^{##}p < 0.01$ . Compared to Ad/BgIII-infected groups,  $^{*}p < 0.05$ . Data represented the mean  $\pm$  SD of four independent triplicate experiments (N=12). Comparison of differences between two groups was performed by a *t-test*.
